# Supplementary material for: Alternative Splicing, Epigenetic Modifications and Cancer: A Dangerous Triangle, or a Hopeful One?
Source: MDPI journal article supplement (doi:10.3390/cancers14030560), 2022-01-22
Supplement: s1 [file s1]

# **Alternative splicing, epigenetic modifications and cancer: A dangerous triangle, or a hopeful one?**

Francisco Gimeno-Valiente, Gerardo López-Rodas, Josefa Castillo, Luis Franco

## **SUPPLEMENTARY MATERIALS**

**Table S1.** Writers, readers and erasers of DNA methylation.

| Writers and their functions [1]                                                                                      | Readers [2]                                                       | Erasers and their mechanism [3]                                                |
|----------------------------------------------------------------------------------------------------------------------|-------------------------------------------------------------------|--------------------------------------------------------------------------------|
| DNMT1<br>Responsible for <i>de novo</i> methylation                                                                  | Methyl binding domain (MDB)-containing proteins<br>MeCP1<br>MeCP2 | Ten-eleven translocation (TET) enzymes<br>TET1<br>TET2<br>TET3                 |
| DNMT3A<br>DNMT3B<br>Use hemimethylated DNA as substrate.<br>Function: maintenance of methylation in mitotic division | MBD1<br>MBD2<br>MBD3<br>MBD4                                      | Catalyse oxidative removal of methyl group <i>via</i> 5- hydroxymethylcytosine |
| DNMT3L<br>DNMT3B3<br>No DNA methyl transferase activity; only regulatory roles                                       |                                                                   |                                                                                |

**Table S2.** Writers, readers and erasers of histone acetylation.

| <b>Writers [4–6]</b>                                                                     | <b>Readers [7–11]</b>                                                                      | <b>Erasers [12–14]</b>              |
|------------------------------------------------------------------------------------------|--------------------------------------------------------------------------------------------|-------------------------------------|
| <i>GCN5/PCAF family (GNAT)</i>                                                           | <b>Bromodomain</b>                                                                         | <i>CLASS I family</i>               |
| GCN5 (KAT2A), PCAF (KAT2B), HAT1 (KAT1), ELP3 (KAT9), ATF2                               | <i>BRD family I</i>                                                                        | HDAC1, HDAC2, HDAC3, HDAC8          |
| <i>MYST family</i>                                                                       | PCAF, GCN5L2, FALZ/BPTF, CECR2, BAZ1A                                                      | <i>CLASS IIa family</i>             |
| MOF/MYST1 (KAT8), MOZ/MYST3 (KAT6A), MORF/MYST4 (KAT6B), HBO1/MYST2 (KAT7), TIP60 (KAT5) | <i>BRD family II</i>                                                                       | HDAC4, HDAC5, HDAC7, HDAC9a, HDAC9b |
| <i>p300/CBP family</i>                                                                   | BRD2, BRD3, BRD4, BRDT                                                                     | <i>CLASS IIb family</i>             |
| CBO (KAT3B), CBP (KAT3A)                                                                 | <i>BRD family III</i>                                                                      | HDAC6, HDAC10                       |
| <i>SRC family</i>                                                                        | EP300, CREBBP, WDR9, PHIP, BRD8B, BAZ1B, BRWD3                                             | <i>CLASS IV family</i>              |
| SRC-1 (KAT13A), ACTR/SRC-3 (KAT13B), TIF-2 /NCOA2(KAT13C), CLOCK (KAT13D)                | <i>BRD family IV</i>                                                                       | HDAC11                              |
| <i>TRANSCRIPTION CO-ACTIVATORS family</i>                                                | BRD1, BRD7, BRD9, BRPF1A, BRPF1B, BRPF3, ATAD2, ATAD2B/KIAA1240                            | <i>SIRTUINS</i>                     |
| TAF1/TAFII250 (KAT4), FIIC220/ GTF3C1                                                    | <i>BRD family V</i>                                                                        | SIRT1-7                             |
|                                                                                          | TRIM66, TRIM33, TRIM24/TIF1 $\alpha$ , SP100, SP110, SP140, SP140L, LOC93349, BAZ2A, BAZ2B |                                     |
|                                                                                          | <i>BRD family VI</i>                                                                       |                                     |
|                                                                                          | MLL, TRIM28                                                                                |                                     |
|                                                                                          | <i>BRD family VII</i>                                                                      |                                     |
|                                                                                          | ZMYND11, ZMYND8, TAF1, TAF1L, WDR9d1, BRWD3d1, PHIPd1                                      |                                     |
|                                                                                          | <i>BRD family VIII</i>                                                                     |                                     |
|                                                                                          | ASH1L, SMARCA2, SMARCA4, PBRM1/PB1                                                         |                                     |
|                                                                                          | <b>Tandem-PHD domain</b>                                                                   |                                     |
|                                                                                          | MOZ (KAT6A), MORF (KAT6B), DPF1 (BAF complex), DPF2 (BAF complex), DPF3 (BAF complex)      |                                     |
|                                                                                          | <b>YEATS domain</b>                                                                        |                                     |
|                                                                                          | AF9 (YEATS3), YAF9 (YEATS4), YEATS2, ENL (YEATS1)                                          |                                     |

Details on writers, readers and erasers can be found at <http://weram.biocuckoo.org/>

**Table S3.** Writers, readers and erasers of histone methylation.

| Writers [11,13,15]                      | Readers [8,11,13]                 | Erasers [11,13]                                       |
|-----------------------------------------|-----------------------------------|-------------------------------------------------------|
| <b>K-HMT</b>                            | <b>Chromodomain</b>               | <b>K-HDM</b>                                          |
| <b>SET domain</b>                       | CHD1, HP1, CDY1, PC1/PC2/PC/LHP1, | <b>FAD-dependent amine oxidase</b>                    |
| <i>SUV39 family</i>                     | MSL3, MRG15, CBX1-8, MPP8, Tip60, | <i>LSD1 family</i>                                    |
| SUB39H1, SUV39H2, G9A, GLP, ESET, CLLL8 | <b>PHD domain</b>                 | LSD1(KDM1A), LSD2 (KDM1B)                             |
| <i>SET1 family</i>                      | ING1-5, BPTF, RAG2, TAF3, ICBP90, | <b>Fe<sup>2+</sup> and α-KG dependent dioxygenase</b> |
| MLL1, MLL2, SET1A, SET1B, MLL4, MLL3,   | PYGO, CHD4, UHRF1 (ICBP90), DPF3, | <i>KDM2 family</i>                                    |
| EZH2, EZH1                              | KDM5A (JARID1A), KDM5C (JARID1C), | KDM2A, KDM2B                                          |
| <i>SET2 family</i>                      | KDM7D (JMJD1D), KMT2A (MLL1),     | <i>KDM3 family</i>                                    |
| ASH1, NSD1, NSD2, NSD3, HYPB/HIF1       | KDM7B (PHF8), KDM7C (PHF2)        | KDM3A-3C (JMJD1A-1C)                                  |
| <i>RIZ family</i>                       | <b>Tudor domain</b>               | <i>KDM4 family</i>                                    |
| PRDM1/BLIMP, PDRM2/RIZ, PRDM4/PFM1      | JMJD2A, 53BP1, PHF1, PHF19,       | KDM4A-4D                                              |
| <i>SMYD family</i>                      | PHF20, TDRD3                      | <i>KDM5 family</i>                                    |
| SMYD1, SMYD3                            | <b>PWWP domain</b>                | KDM5A-5D (JARID1A-1D)                                 |
| <i>SUV4-20 family</i>                   | DNMT3A, BRPF1, PDP1, HDGF2, PSIP1 | <i>KDM6 family</i>                                    |
| SUV4-20H1, SUV4-20H2                    | (LEDGF)                           | KDM6A(UTX), KDM6B(JMJD3), KDM6C(UTY)                  |
| <i>SET7/9 family</i>                    | <b>MBT domain</b>                 | <i>KDM7 family</i>                                    |
| SET7, SET9                              | PHF20L1, SFMBT, L3MBTL1/2, MBTD1  | KDM7A(JMJD1D), KDM7B(PHF8), KDM7C(PHF2)               |
| <b>Non-SET domain</b>                   | <b>WDR domain</b>                 | <i>KDM8 family</i>                                    |
| DOT1L                                   | ELP2 (STATIP1), EED, WDR5, TBL1X, | KDM8 (JMJD5)                                          |
| <b>R-HMT</b>                            | TBL1XR1, L3MBTL2 (LIN-61)         | <b>R-HDM</b>                                          |
| <i>PRMT Type-I family</i>               | <b>14-3-3 domain</b>              | PAD4/PADI4, JMJD6                                     |
| PRMT1, PRMT2, PRMT3, PRMT4 (CARM1),     | 14-3-3                            |                                                       |
| PRMT6, PRMT8                            | <b>ZF-CW domain</b>               |                                                       |
| <i>PRMT Type-II family</i>              | ZCWPW1                            |                                                       |
| PRMT5, PRMT9                            | <b>Ankyrin domain</b>             |                                                       |
| <i>PRMT Type-III family</i>             | G9A/GLP                           |                                                       |
| PRMT7                                   |                                   |                                                       |

Details on writers, readers and erasers can be found at <http://weram.biocuckoo.org/>

**Table S4.** Epidrugs approved or under clinical trial.

| Inhibitors of DNA methylation |          | Inhibitors of HDACs |                         | Inhibitors of bromodomains |        | Inhibitors of PRMTs |        |
|-------------------------------|----------|---------------------|-------------------------|----------------------------|--------|---------------------|--------|
| Name                          | status   | Name                | status                  | name                       | status | name                | status |
| Azacitidine                   | approved | Panobinostat        | approved                | I-BET762                   | CT     | GSK3326595          | CT     |
| Decitabine                    | approved | Belinostat          | approved                | Birabresib                 | CT     | AMG 193             | CT     |
| Aza-TdCyd                     | CT       | Valproic Acid       | approved                | CPI-610                    | CT     | JNJ-64619178        | CT     |
|                               |          | Romidepsin          | approved                | FT-1101                    | CT     | PF-06939999         | CT     |
|                               |          | Vorinostat          | approved                | ZEN-3694                   | CT     | PRT811              | CT     |
|                               |          | Pracinostat         | approved as orphan drug | BMS-986158                 | CT     | IDE397              | CT     |
|                               |          | Entinostat          | CT                      | OTX-015                    | CT     | PRT543              | CT     |
|                               |          | Abexinostat         | CT                      | ABBV-075                   | CT     |                     |        |
|                               |          | CUDC-101            | CT                      | GS-5829                    | CT     |                     |        |
|                               |          | Givinostat          | CT                      | PLX-51107                  | CT     |                     |        |
|                               |          | Mocetinostat        | CT                      | TEN-010                    | CT     |                     |        |

The names of the epidrugs approved or under clinical trials (CT) are given, although some of them were approved for diseases other than cancer. Further details can be obtained from [16,17]. The progress of the clinical trials can be checked at <https://www.clinicaltrials.gov/>

**Table S5.** Drugs targeting mRNA splicing, approved or under clinical trials.

| Splicing modulators |                         | Drugs targeting enzymes involved in splicing |        |        |
|---------------------|-------------------------|----------------------------------------------|--------|--------|
| Name                | status                  | name                                         | status | target |
| Risdiplam           | approved                | SM08502                                      | CT     | CLKs   |
| Branaplam           | approved as orphan drug |                                              |        |        |
| Aclarubicin         | CT                      |                                              |        |        |

The names of the drugs approved or under clinical trials (CT) are given. CLK stands for CDC2-like kinases. Further details can be obtained from [18–20]. The progress of the clinical trials can be checked at <https://www.clinicaltrials.gov/>

## ADDITIONAL REFERENCES

1. Nishiyama, A.; Nakanishi, M. Navigating the DNA methylation landscape of cancer. *Trends Genet.* **2021**, *37*, 1012–1027.
2. Ginder, G.D.; Williams, D.C. Readers of DNA methylation, the MBD family as potential therapeutic targets. *Pharmacol. Ther.* **2018**, *184*, 98–111.
3. Wu, X.; Zhang, Y. TET-mediated active DNA demethylation: mechanism, function and beyond. *Nat. Rev. Genet.* **2017**, *18*, 517–534.
4. Roth, S.Y.; Denu, J.M.; Allis, C.D. Histone acetyltransferases. *Annu. Rev. Biochem.* **2001**, *81*, 81–120.
5. Marmorstein, R.; Roth, S.Y. Histone acetyltransferases: Function, structure, and catalysis. *Curr. Opin. Genet. Dev.* **2001**, *11*, 155–161.
6. Sapountzi, V.; Côté, J. MYST-family histone acetyltransferases: Beyond chromatin. *Cell. Mol. Life Sci.* **2011**, *68*, 1147–1156.
7. Filippakopoulos, P.; Qi, J.; Picaud, S.; Shen, Y.; Smith, W.B.; Fedorov, O.; Morse, E.M.; Keates, T.; Hickman, T.T.; Felletar, I.; et al. Selective inhibition of BET bromodomains. *Nature* **2010**, *468*, 1067–1073.
8. Yun, M.; Wu, J.; Workman, J.L.; Li, B. Readers of histone modifications. *Cell Res.* **2011**, *21*, 564–578.
9. Marmorstein, R.; Zhou, M.M. Writers and readers of histone acetylation: Structure, mechanism, and inhibition. *Cold Spring Harb. Perspect. Biol.* **2014**, *6*, a018762.
10. Jain, A.K.; Barton, M.C. Bromodomain histone readers and cancer. *J. Mol. Biol.* **2017**, *429*, 2003–2010.
11. Biswas, S.; Rao, C.M. Epigenetic tools (The Writers, The Readers and The Erasers) and their implications in cancer therapy. *Eur. J. Pharmacol.* **2018**, *837*, 8–24.
12. Seto, E.; Yoshida, M. Erasers of histone acetylation: The histone deacetylase enzymes. *Cold Spring Harb. Perspect. Biol.* **2014**, *6*, a018713.
13. Hyun, K.; Jeon, J.; Park, K.; Kim, J. Writing, erasing and reading histone lysine methylations. *Exp. Mol. Med.* **2017**, *49*, e324.
14. Park, S.Y.; Kim, J.S. A short guide to histone deacetylases including recent progress on class II enzymes. *Exp. Mol. Med.* **2020**, *52*, 204–212.
15. Yang, Q.; Yang, Y.; Zhou, N.; Tang, K.; Lau, W.B.; Lau, B.; Wang, W.; Xu, L.; Yang, Z.; Huang, S.; et al. Epigenetics in ovarian cancer: Premise, properties, and perspectives. *Mol. Cancer* **2018**, *17*, 109.
16. Miranda Furtado, C.L.; Dos Santos Luciano, M.C.; Silva Santos, R. Da; Furtado, G.P.; Moraes, M.O.; Pessoa, C. Epidrugs: targeting epigenetic marks in cancer treatment. *Epigenetics* **2019**, *14*, 1164–1176.
17. Lu, Y.; Chan, Y.T.; Tan, H.Y.; Li, S.; Wang, N.; Feng, Y. Epigenetic regulation in human cancer: The potential role of epi-drug in cancer therapy. *Mol. Cancer* **2020**, *19*, 79.

18. Martinez-Montiel, N.; Rosas-Murrieta, N.H.; Ruiz, M.A.; Monjaraz-Guzman, E.; Martinez-Contreras, R. Alternative splicing as a target for cancer treatment. *Int. J. Mol. Sci.* **2018**, *19*, 545.
19. Black, A.J.; Gamarra, J.R.; Giudice, J. More than a messenger: Alternative splicing as a therapeutic target. *Biochim. Biophys. Acta - Gene Regul. Mech.* **2019**, *1862*, 194395.
20. Tang, Z.; Zhao, J.; Pearson, Z.J.; Boskovic, Z. V; Wang, J. RNA-targeting splicing modifiers: Drug development and screening assays. *Molecules* **2021**, *26*, 2263.
